# Supplementary material
Source: publisher figshare collection journal article supplement (https://gsajournals.figshare.com/ndownloader/files/11749880)
Supplement: Supplementary file 1 [file 11749880]

## Supplemental Figures and Tables

---

Genomic prediction accounting for genotype by environment interaction offers an effective framework for breeding simultaneously for adaptation to an abiotic stress and performances under normal cropping conditions in rice.

Ben Hassen M<sup>\*,†,‡,1</sup>, Bartholomé J<sup>†,‡,1</sup>, Valè G<sup>§</sup>, Cao TV<sup>†,‡,1</sup>, Ahmadi N<sup>†,‡</sup>

<sup>†</sup> CIRAD, UMR AGAP, F-34398 Montpellier, France.

<sup>‡</sup> AGAP, Univ Montpellier, CIRAD, INRA, Montpellier SupAgro, Montpellier, France.

<sup>§</sup> CREA- Council for Agricultural Research and Economics, Research Center for Cereal and Industrial Crops, S. S. 11 to Torino Km 2.5, Vercelli, 13100, Italy

<sup>1</sup> These authors have contributed equally to the work

\* Corresponding author. [nourollah.ahmadi@cirad.fr](mailto:nourollah.ahmadi@cirad.fr)

The following supporting information is available for this article:

**Figure S1:** Correlation matrix between performance in each condition (continuous flooding – CF and alternate wetting and drying – AWD) and response variables (response index and slope of the joint regression) for the three traits considered: days to flowering (FL), nitrogen-balance index (NI), and panicle weight (PW). The reference (RP) and progeny (PP) populations are in green and grey, respectively.

**Figure S2:** Single environment and multi-environment (M1 and M2) predictive abilities in cross validation experiments with 40% of untested entries in the reference population obtained with three statistical models (GBLUP, RKHS-1, RKHS-2). Continuous flooding and alternate wetting and drying water management conditions are in blue and orange, respectively. Three traits are presented: days to flowering (FL), nitrogen balance index (NI) panicle weight (PW). The letters in each panel represent the results of Tukey’s HSD comparison of means and apply to each panel independently. The means differ significantly ( $p$ -value  $< 0.05$ ) if two boxplots have no letter in common.

**Table S1:** Variance components and the associated statistic (F-value for fixed effects and Z-value for random effects) of days to flowering (FL), nitrogen balance index (NI), and panicle weight (PW). Separate analysis of each population and each water management system (continuous flooding – CF and alternate wetting and drying – AWD).

**Table S2:** Variance components and the associated statistic: F-value for fixed effects and Z-value for random effects) of days to flowering (FL), nitrogen balance index (NI), and panicle weight (PW). Separate analysis of each population pooled over water management conditions (continuous flooding – CF and alternate wetting and drying – AWD).

**Table S3:** Variance components for the joint regression for days to flowering (FL), nitrogen balance index (NI), and panicle weight (PW). Results are shown for the reference and progeny populations.

**Table S4:** Mean genomic predictive abilities in the reference population for the response variables (index and slope) and the performance within each condition (continuous flooding – CF and alternate wetting and drying – AWD). The results for days to flowering (FL), nitrogen balance index (NI) and panicle weight (PW) are presented. Two statistical models (GBLUP and RKHS) were used.

**Table S5:** Genomic predictive abilities for across population validation for the response variables (index and slope) and the performance within each condition (continuous flooding – CF and alternate wetting and drying – AWD). The scenarios used to define the training set are S1 (only the parents), S2 (100 individuals of the RP selected with CDmean) and S3 (the whole RP). Results for days to flowering (FL), nitrogen balance index (NI) and panicles weight (PW) are presented. Two statistical models (GBLUP and RKHS) were used.

**Table S6:** Mean genomic predictive ability of the performance within each condition (continuous flooding – CF and alternate wetting and drying – AWD) using single or multi-environment models in the reference population. For multi-environment models, two methods of cross-validation were used: M1 and M2. In addition to genomic predictive ability, the phenotypic predictive ability evaluated as the correlation between the performances in the two conditions using the same random sampling as in M2 cross-validation are provided. Results for days to flowering (FL), nitrogen balance index (NI) and panicle weight (PW) are presented. Two statistical models (GBLUP, RKHS) were used in single environment prediction and three (GBLUP, RKHS-1 and RKHS-2) in multi-environment prediction.

**Table S7:** Genomic predictive abilities of the performance within each condition (continuous flooding – CF and alternate wetting and drying – AWD) using single or multi-environment models for across population validation. The scenarios used to define the training set are S1 (only the parents), S2 (100 individuals of the RP selected with CDmean) and S3 (the whole RP). Results for days to flowering (FL), nitrogen balance index (NI) and panicle weight (PW) are presented. Two statistical models (GBLUP,

RKHS) were used in single environment prediction and three (GBLUP, RKHS-1 and RKHS-2) in multi-environment prediction.

**FL**

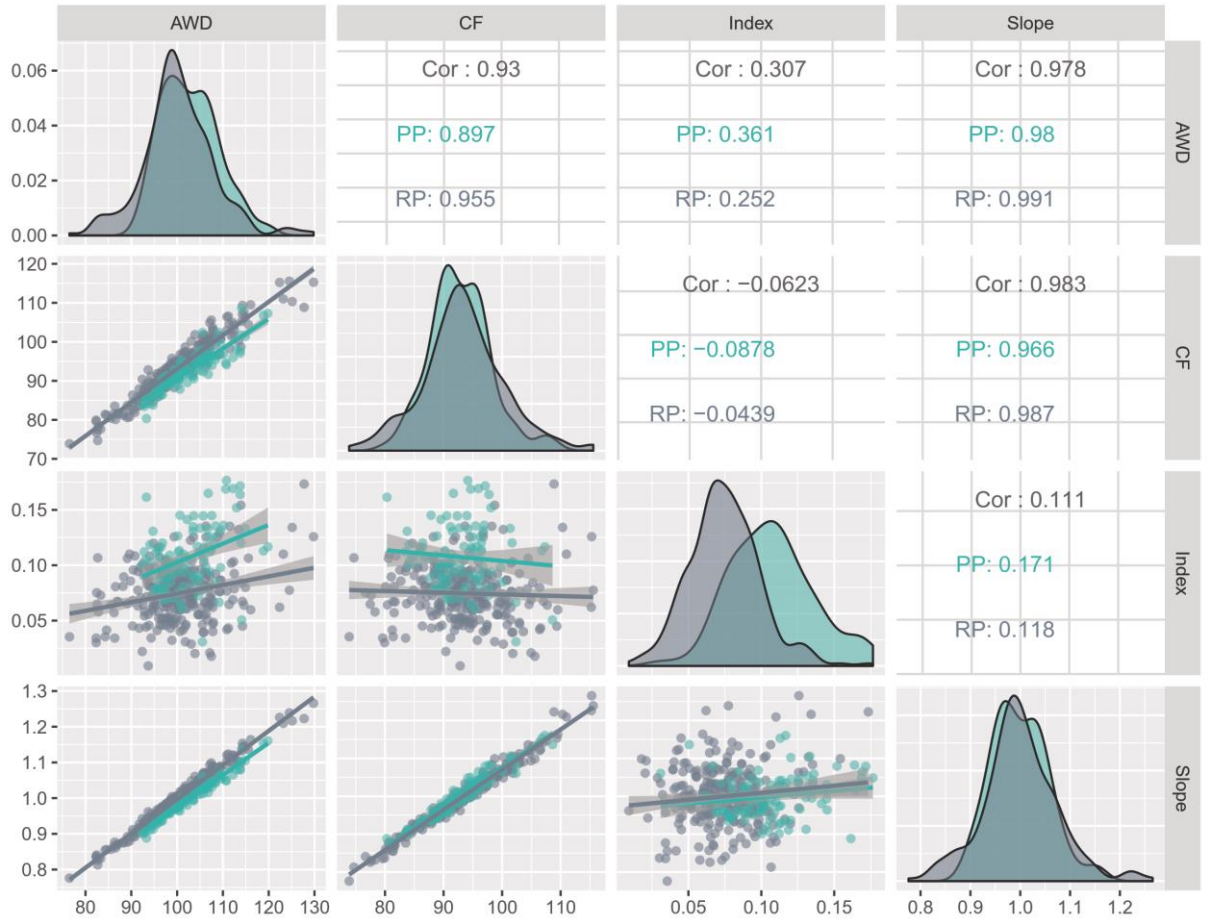

**NI**

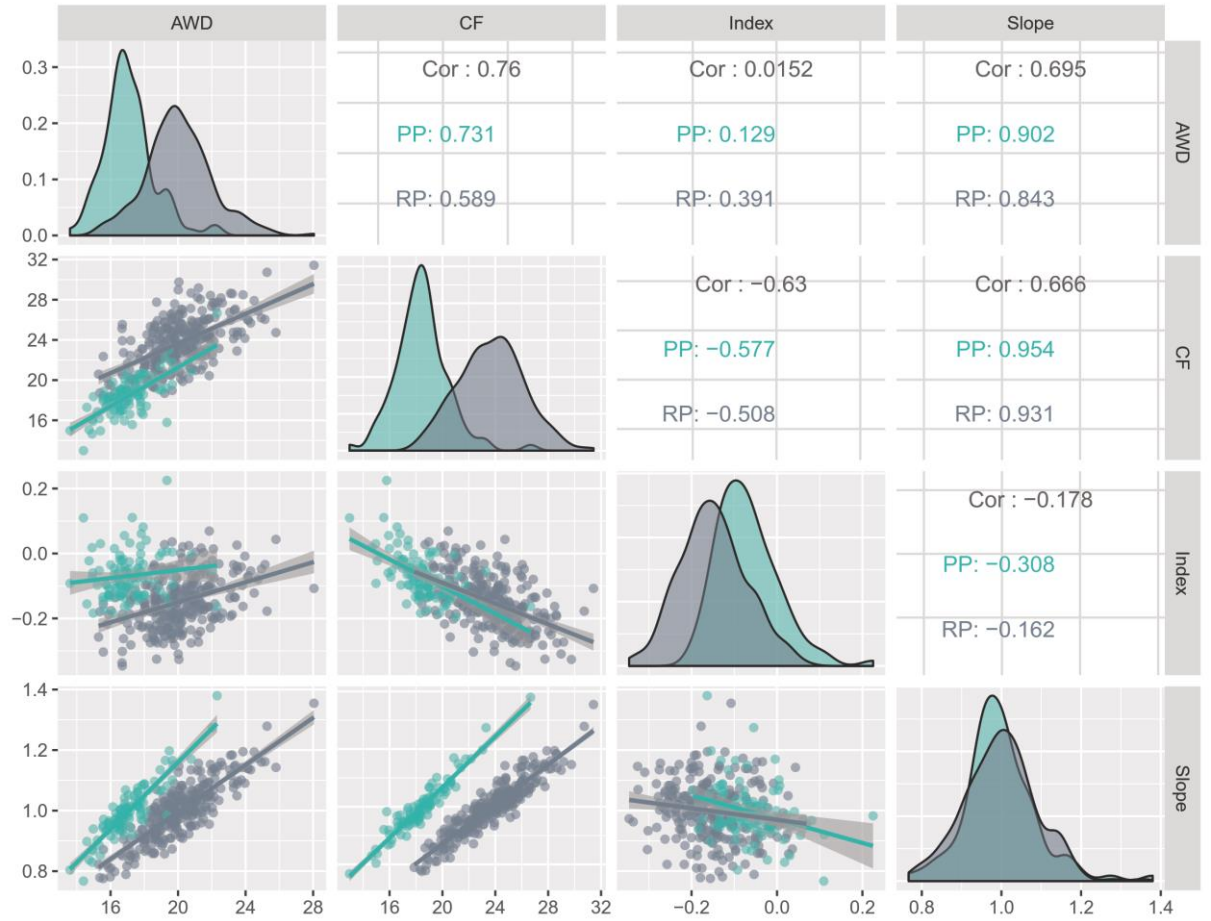

**PW**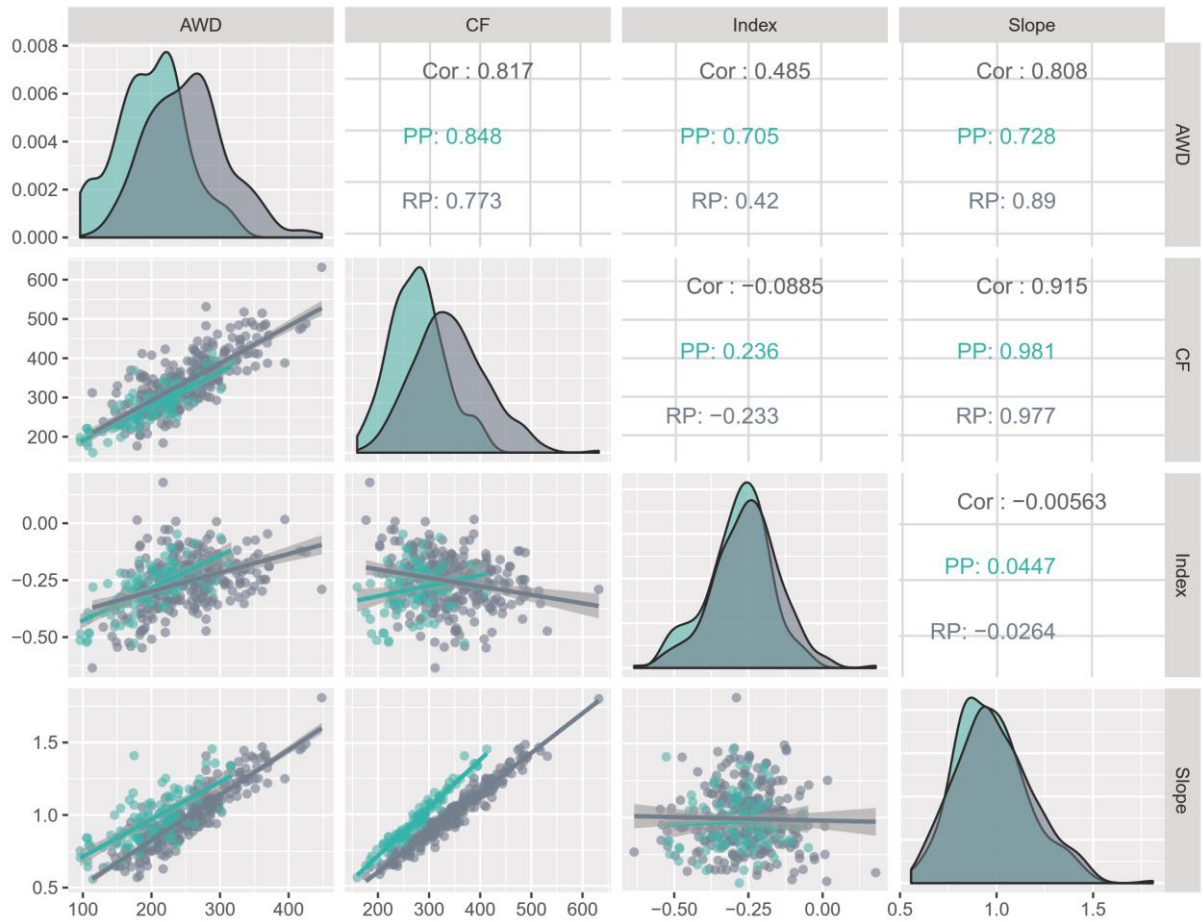

**Figure S1:** Correlation matrix between performance in each condition (continuous flooding – CF and alternate wetting and drying – AWD) and response variables (response index and slope of the joint regression) for the three traits considered: days to flowering (FL), nitrogen-balance index (NI), and panicle weight (PW). The reference (RP) and progeny (PP) populations are in green and grey, respectively.

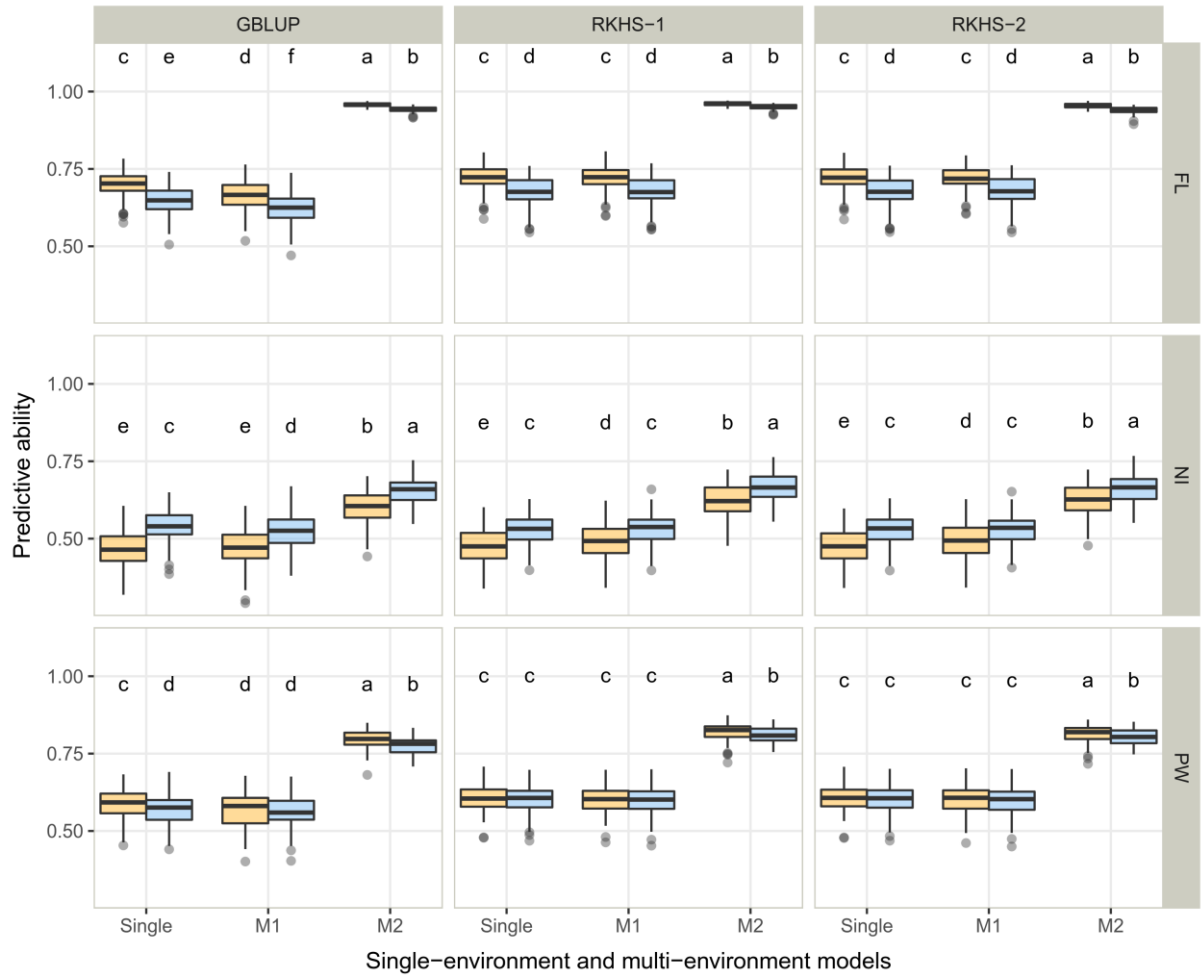

**Figure S2:** Single environment and multi-environment (M1 and M2) predictive abilities in cross validation experiments with 40% of untested entries in the reference population obtained with three statistical models (GBLUP, RKHS-1, RKHS-2). Continuous flooding and alternate wetting and drying water management conditions are in blue and orange, respectively. Three traits are presented: days to flowering (FL), nitrogen balance index (NI) panicle weight (PW). The letters in each panel represent the results of Tukey's HSD comparison of means and apply to each panel independently. The means differ significantly ( $p$ -value < 0.05) if two boxplots have no letter in common.

**Table S1:** Variance components and the associated statistic (F-value for fixed effects and Z-value for random effects) of days to flowering (FL), nitrogen balance index (NI), and panicle weight (PW). Separate analysis of each population and each water management system (continuous flooding – CF and alternate wetting and drying – AWD).

| Population | Trait | Condition | Fixed / Random | Source           | Estimate | Standard error of the estimate | F or Z statistic | p-value |
|------------|-------|-----------|----------------|------------------|----------|--------------------------------|------------------|---------|
| Reference  | FL    | AWD       | Fixed          | Year             |          |                                | 1700.49          | <.0001  |
|            |       |           | Random         | Genotype         | 57.6813  | 5.5461                         | 10.4             | <.0001  |
|            |       |           |                | Year * Genotype  | 10.9007  | 1.2604                         | 8.65             | <.0001  |
|            |       |           |                | Residual         | 11.2789  | 0.4755                         | 23.72            | <.0001  |
|            |       | CF        | Fixed          | Year             |          |                                | 753.03           | <.0001  |
|            |       |           | Random         | Genotype         | 47.7834  | 4.2925                         | 11.13            | <.0001  |
|            |       |           |                | Year * Genotype  | 4.3612   | 0.5405                         | 8.07             | <.0001  |
|            |       |           |                | Residual         | 5.9523   | 0.2501                         | 23.8             | <.0001  |
|            | NBI   | AWD       | Fixed          | Year             |          |                                | 82.39            | <.0001  |
|            |       |           | Random         | Genotype         | 4.9925   | 0.7344                         | 6.8              | <.0001  |
|            |       |           |                | Year * Genotype  | 1.2169   | 0.568                          | 2.14             | 0.0161  |
|            |       |           |                | Residual         | 14.7108  | 0.6268                         | 23.47            | <.0001  |
|            |       | CF        | Fixed          | Year             |          |                                | 87.34            | <.0001  |
|            |       |           | Random         | Genotype         | 6.1702   | 1.0147                         | 6.08             | <.0001  |
|            |       |           |                | Year * Genotype  | 4.0852   | 0.8514                         | 4.8              | <.0001  |
|            |       |           |                | Residual         | 16.7468  | 0.7088                         | 23.63            | <.0001  |
|            | PW    | AWD       | Fixed          | Year             |          |                                | 191.12           | <.0001  |
|            |       |           | Random         | Genotype         | 3435.39  | 390.5                          | 8.8              | <.0001  |
|            |       |           |                | Year * Genotype  | 949.48   | 189.58                         | 5.01             | <.0001  |
|            |       |           |                | Residual         | 3142.66  | 140.95                         | 22.3             | <.0001  |
|            |       | CF        | Fixed          | Year             |          |                                | 39.66            | <.0001  |
|            |       |           | Random         | Genotype         | 5088.95  | 505.4                          | 10.07            | <.0001  |
|            |       |           |                | Year * Genotype  | 850.38   | 150.39                         | 5.65             | <.0001  |
|            |       |           |                | Residual         | 2437.24  | 105.68                         | 23.06            | <.0001  |
| Progeny    | FL    | AWD       | Fixed          | Year             |          |                                | 642.63           | <.0001  |
|            |       |           | Random         | Repetition       |          |                                | 3.91             | 0.004   |
|            |       |           |                | Genotype         | 35.1488  | 6.0138                         | 5.84             | <.0001  |
|            |       |           |                | Year * Genotype  | 8.1658   | 1.7861                         | 4.57             | <.0001  |
|            |       | CF        | Fixed          | Year             |          |                                | 656.75           | <.0001  |
|            |       |           | Random         | Repetition(Year) |          |                                | 7.84             | <.0001  |
|            |       |           |                | Genotype         | 23.1957  | 3.9792                         | 5.83             | <.0001  |
|            |       |           |                | Year * Genotype  | 7.3783   | 1.1809                         | 6.25             | <.0001  |
|            |       |           |                | Residual         | 2.2718   | 0.1648                         | 13.78            | <.0001  |
|            | NBI   | AWD       | Fixed          | Year             |          |                                | 92.76            | <.0001  |
|            |       |           | Random         | Repetition(Year) |          |                                | 15.69            | <.0001  |
|            |       |           |                | Genotype         | 3.0271   | 0.5762                         | 5.25             | <.0001  |
|            |       |           |                | Year * Genotype  | 0        |                                |                  |         |
|            |       | CF        | Fixed          | Year             |          |                                | 234.1            | <.0001  |
|            |       |           | Random         | Repetition(Year) |          |                                | 3.87             | 0.0043  |
|            |       |           |                | Genotype         | 4.1183   | 0.7624                         | 5.4              | <.0001  |
|            |       |           |                | Year * Genotype  | 0.696    | 0.3059                         | 2.28             | 0.0114  |
|            |       |           |                | Residual         | 3.7236   | 0.2808                         | 13.26            | <.0001  |
|            | PW    | AWD       | Fixed          | Year             |          |                                | 224.57           | <.0001  |
|            |       |           | Random         | Repetition(Year) |          |                                | 36.36            | <.0001  |
|            |       |           |                | Genotype         | 2487.8   | 408.02                         | 6.1              | <.0001  |
|            |       |           |                | Year * Genotype  | 466.32   | 93.7984                        | 4.97             | <.0001  |
|            |       | CF        | Fixed          | Year             |          |                                | 19.33            | <.0001  |
|            |       |           | Random         | Repetition(Year) |          |                                | 51.44            | <.0001  |
|            |       |           |                | Genotype         | 2698.52  | 435.18                         | 6.2              | <.0001  |
|            |       |           |                | Year * Genotype  | 415.49   | 88.7666                        | 4.68             | <.0001  |
|            |       |           |                | Residual         | 554      | 40.3973                        | 13.71            | <.0001  |

**Table S2:** Variance components and the associated statistic: F-value for fixed effects and Z-value for random effects) of days to flowering (FL), nitrogen balance index (NI), and panicle weight (PW). Separate analysis of each population pooled over water management conditions (continuous flooding – CF and alternate wetting and drying – AWD).

| Population | Trait | Fixed / Random | Source                  | Estimate | Standard error of the estimate | F or Z statistic | Respective p-value |
|------------|-------|----------------|-------------------------|----------|--------------------------------|------------------|--------------------|
| Reference  | FL    | Fixed          | Year                    |          |                                | 1634.20          | <.0001             |
|            |       |                | Condition               |          |                                | 2294.10          | <.0001             |
|            |       |                | Condition*Year          |          |                                | 731.78           | <.0001             |
|            |       | Random         | Genotype                | 52.01    | 4.73                           | 10.99            | <.0001             |
|            |       |                | Year*Genotype           | 5.19     | 0.70                           | 7.40             | <.0001             |
|            |       |                | Condition*Genotype      | 0.32     | 0.35                           | 0.91             | 0.1805             |
|            |       |                | Condition*Year*Genotype | 2.49     | 0.47                           | 5.31             | <.0001             |
|            |       |                | Residual                | 8.63     | 0.26                           | 33.53            | <.0001             |
|            | NBI   | Fixed          | Year                    |          |                                | 2.06             | 0.1526             |
|            |       |                | Condition               |          |                                | 476.53           | <.0001             |
|            |       |                | Condition*Year          |          |                                | 217.82           | <.0001             |
|            |       | Random         | Genotype                | 4.66     | 0.70                           | 6.62             | <.0001             |
|            |       |                | Year*Genotype           | 1.83     | 0.49                           | 3.74             | <.0001             |
|            |       |                | Condition*Genotype      | 0.92     | 0.43                           | 2.16             | 0.0155             |
|            |       |                | Condition*Year*Genotype | 0.81     | 0.54                           | 1.49             | 0.068              |
|            |       |                | Residual                | 15.75    | 0.47                           | 33.28            | <.0001             |
|            | PW    | Fixed          | Year                    |          |                                | 36.59            | <.0001             |
|            |       |                | Condition               |          |                                | 914.07           | <.0001             |
|            |       |                | Condition*Year          |          |                                | 212.19           | <.0001             |
|            |       | Random         | Genotype                | 3961.99  | 395.27                         | 10.02            | <.0001             |
|            |       |                | Year*Genotype           | 15.53    | 118.61                         | 0.13             | 0.4479             |
|            |       |                | Condition*Genotype      | 312.42   | 135.38                         | 2.31             | 0.0105             |
|            |       |                | Condition*Year*Genotype | 869.37   | 167.40                         | 5.19             | <.0001             |
|            |       |                | Residual                | 2787.24  | 87.08                          | 32.01            | <.0001             |
| Progeny    | FL    | Fixed          | Year                    |          |                                | 843.72           | <.0001             |
|            |       |                | Rep(Year)               |          |                                | 8.25             | <.0001             |
|            |       |                | Condition               |          |                                | 1168.88          | <.0001             |
|            |       |                | Condition*Year          |          |                                | 23.54            | <.0001             |
|            |       | Random         | Genotype                | 27.46    | 4.69                           | 5.86             | <.0001             |
|            |       |                | Year*Genotype           | 5.30     | 1.17                           | 4.51             | <.0001             |
|            |       |                | Condition*Genotype      | 1.68     | 0.69                           | 2.45             | 0.0072             |
|            |       |                | Condition*Year*Genotype | 2.49     | 0.71                           | 3.51             | 0.0002             |
|            |       |                | Residual                | 7.01     | 0.36                           | 19.52            | <.0001             |
|            | NBI   | Fixed          | Year                    |          |                                | 268.27           | <.0001             |
|            |       |                | Rep(Year)               |          |                                | 8.56             | <.0001             |
|            |       |                | Condition               |          |                                | 85.02            | <.0001             |
|            |       |                | Condition*Year          |          |                                | 22.22            | <.0001             |
|            |       | Random         | Genotype                | 3.25     | 0.59                           | 5.48             | <.0001             |
|            |       |                | Year*Genotype           | 0.32     | 0.17                           | 1.81             | 0.0352             |
|            |       |                | Condition*Genotype      | 0.32     | 0.18                           | 1.79             | 0.037              |
|            |       |                | Condition*Year*Genotype | 0.00     |                                |                  |                    |
|            |       |                | Residual                | 4.78     | 0.24                           | 19.91            | <.0001             |
|            | PW    | Fixed          | Year                    |          |                                | 47.35            | <.0001             |
|            |       |                | Rep(Year)               |          |                                | 64.92            | <.0001             |
|            |       |                | Condition               |          |                                | 689.06           | <.0001             |
|            |       |                | Condition*Year          |          |                                | 261.44           | <.0001             |
|            |       | Random         | Genotype                | 2394.72  | 390.55                         | 6.13             | <.0001             |
|            |       |                | Year*Genotype           | 163.54   | 66.14                          | 2.47             | 0.0067             |
|            |       |                | Condition*Genotype      | 194.30   | 69.46                          | 2.80             | 0.0026             |
|            |       |                | Condition*Year*Genotype | 260.52   | 67.47                          | 3.86             | <.0001             |
|            |       |                | Residual                | 584.89   | 30.06                          | 19.45            | <.0001             |



**Table S3:** Variance components for the joint regression for days to flowering (FL), nitrogen balance index (NI), and panicle weight (PW). Results are shown for the reference and progeny populations.

| Population | Trait | Joint regression parameters | Estimates | Standard error of the estimates | Z statistics | p-values | Confidence limits |          |
|------------|-------|-----------------------------|-----------|---------------------------------|--------------|----------|-------------------|----------|
|            |       |                             |           |                                 |              |          | Lower             | Upper    |
| Reference  | FL    | $\mu_i$                     | 0         |                                 |              |          |                   |          |
|            | FL    | $\beta_i$                   | 1.0055    | 0.08439                         | 11.91        | <.0001   | 0.8586            | 1.1938   |
|            | NI    | $\mu_i$                     | 0         |                                 |              |          |                   |          |
|            | NI    | $\beta_i$                   | 1.0063    | 0.08462                         | 11.89        | <.0001   | 0.859             | 1.1951   |
|            | PW    | $\mu_i$                     | 357.34    | 2651.71                         | 0.13         | 0.4464   | 39.2821           | 1.89E+89 |
|            | PW    | $\beta_i$                   | 1.0327    | 0.09148                         | 11.29        | <.0001   | 0.8745            | 1.2383   |
| Progeny    | FL    | $\mu_i$                     | 0         |                                 |              |          |                   |          |
|            | FL    | $\beta_i$                   | 1.003     | 0.144                           | 6.96         | <.0001   | 0.7712            | 1.3581   |
|            | NI    | $\mu_i$                     | 0         |                                 |              |          |                   |          |
|            | NI    | $\beta_i$                   | 1.007     | 0.1448                          | 6.95         | <.0001   | 0.7741            | 1.3641   |
|            | PW    | $\mu_i$                     | 2033.77   | 2511.54                         | 0.81         | 0.209    | 457.74            | 432973   |
|            | PW    | $\beta_i$                   | 1.0045    | 0.1504                          | 6.68         | <.0001   | 0.7644            | 1.3792   |

**Table S4:** Mean genomic predictive abilities in the reference population for the response variables (index and slope) and the performance within each condition (continuous flooding – CF and alternate wetting and drying – AWD). The results for days to flowering (FL), nitrogen balance index (NI) and panicle weight (PW) are presented. Two statistical models (GBLUP and RKHS) were used.

| Phenotype | Model | FL   |      | NI   |      | PW   |      |
|-----------|-------|------|------|------|------|------|------|
|           |       | Mean | SE   | Mean | SE   | Mean | SE   |
| Index     | GBLUP | 0.29 | 0.12 | 0.21 | 0.11 | 0.43 | 0.10 |
| Index     | RKHS  | 0.30 | 0.13 | 0.17 | 0.12 | 0.48 | 0.09 |
| Slope     | GBLUP | 0.69 | 0.08 | 0.59 | 0.08 | 0.62 | 0.07 |
| Slope     | RKHS  | 0.72 | 0.08 | 0.59 | 0.08 | 0.64 | 0.07 |
| AWD       | GBLUP | 0.71 | 0.08 | 0.47 | 0.10 | 0.62 | 0.07 |
| AWD       | RKHS  | 0.74 | 0.08 | 0.48 | 0.09 | 0.63 | 0.06 |
| CF        | GBLUP | 0.66 | 0.08 | 0.56 | 0.08 | 0.59 | 0.08 |
| CF        | RKHS  | 0.70 | 0.08 | 0.55 | 0.08 | 0.62 | 0.07 |

**Table S5:** Genomic predictive abilities for across population validation for the response variables (index and slope) and the performance within each condition (continuous flooding – CF and alternate wetting and drying – AWD). The scenarios used to define the training set are S1 (only the parents), S2 (100 individuals of the RP selected with CDmean) and S3 (the whole RP). Results for days to flowering (FL), nitrogen balance index (NI) and panicles weight (PW) are presented. Two statistical models (GBLUP and RKHS) were used.

| Phenotype | Scenario | Model | FL    | NI    | PW   |
|-----------|----------|-------|-------|-------|------|
| Index     | S1       | GBLUP | 0.24  | 0.16  | 0.17 |
|           |          | RKHS  | 0.15  | -0.10 | 0.14 |
|           | S2       | GBLUP | -0.01 | 0.04  | 0.19 |
|           |          | RKHS  | 0.00  | -0.06 | 0.15 |
|           | S3       | GBLUP | 0.24  | 0.17  | 0.17 |
|           |          | RKHS  | 0.21  | 0.12  | 0.25 |
| Slope     | S1       | GBLUP | 0.30  | 0.25  | 0.51 |
|           |          | RKHS  | 0.38  | 0.04  | 0.56 |
|           | S2       | GBLUP | 0.20  | 0.35  | 0.32 |
|           |          | RKHS  | 0.22  | 0.36  | 0.32 |
|           | S3       | GBLUP | 0.32  | 0.43  | 0.45 |
|           |          | RKHS  | 0.37  | 0.45  | 0.52 |
| AWD       | S1       | GBLUP | 0.32  | 0.25  | 0.51 |
|           |          | RKHS  | 0.37  | 0.03  | 0.54 |
|           | S2       | GBLUP | 0.23  | 0.27  | 0.39 |
|           |          | RKHS  | 0.25  | 0.24  | 0.40 |
|           | S3       | GBLUP | 0.34  | 0.36  | 0.42 |
|           |          | RKHS  | 0.37  | 0.38  | 0.49 |
| CF        | S1       | GBLUP | 0.27  | 0.19  | 0.48 |
|           |          | RKHS  | 0.37  | -0.03 | 0.56 |
|           | S2       | GBLUP | 0.14  | 0.27  | 0.28 |
|           |          | RKHS  | 0.16  | 0.29  | 0.31 |
|           | S3       | GBLUP | 0.28  | 0.39  | 0.42 |
|           |          | RKHS  | 0.36  | 0.41  | 0.52 |

**Table S6:** Mean genomic predictive ability of the performance within each condition (continuous flooding – CF and alternate wetting and drying – AWD) using single or multi-environment models in the reference population. For multi-environment models, two methods of cross-validation were used: M1 and M2. In addition to genomic predictive ability, the phenotypic predictive ability evaluated as the correlation between the performances in the two conditions using the same random sampling as in M2 cross-validation are provided. Results for days to flowering (FL), nitrogen balance index (NI) and panicle weight (PW) are presented. Two statistical models (GBLUP, RKHS) were used in single environment prediction and three (GBLUP, RKHS-1 and RKHS-2) in multi-environment prediction.

| Conditions | Type      | Model  | FL   |      | NI   |      | PW   |      |
|------------|-----------|--------|------|------|------|------|------|------|
|            |           |        | Mean | SE   | Mean | SE   | Mean | SE   |
| AWD        | Single    | GBLUP  | 0.71 | 0.08 | 0.47 | 0.1  | 0.61 | 0.07 |
|            |           | RKHS   | 0.74 | 0.08 | 0.48 | 0.09 | 0.63 | 0.06 |
|            | M1        | GBLUP  | 0.67 | 0.08 | 0.48 | 0.1  | 0.6  | 0.07 |
|            |           | RKHS-1 | 0.74 | 0.08 | 0.5  | 0.1  | 0.63 | 0.06 |
|            |           | RKHS-2 | 0.73 | 0.08 | 0.5  | 0.09 | 0.63 | 0.07 |
|            |           | GBLUP  | 0.96 | 0.01 | 0.59 | 0.09 | 0.8  | 0.04 |
|            |           | RKHS-1 | 0.96 | 0.01 | 0.62 | 0.09 | 0.84 | 0.04 |
|            |           | RKHS-2 | 0.96 | 0.01 | 0.62 | 0.09 | 0.83 | 0.04 |
|            | Phenotype |        | 0.96 | 0.01 | 0.57 | 0.1  | 0.78 | 0.05 |
| CF         | Single    | GBLUP  | 0.66 | 0.08 | 0.56 | 0.08 | 0.59 | 0.08 |
|            |           | RKHS   | 0.7  | 0.08 | 0.55 | 0.08 | 0.62 | 0.07 |
|            | M1        | GBLUP  | 0.63 | 0.09 | 0.54 | 0.09 | 0.59 | 0.08 |
|            |           | RKHS-1 | 0.69 | 0.08 | 0.55 | 0.09 | 0.62 | 0.07 |
|            |           | RKHS-2 | 0.69 | 0.09 | 0.55 | 0.08 | 0.61 | 0.07 |
|            |           | GBLUP  | 0.95 | 0.01 | 0.65 | 0.07 | 0.78 | 0.04 |
|            |           | RKHS-1 | 0.95 | 0.01 | 0.66 | 0.07 | 0.82 | 0.04 |
|            |           | RKHS-2 | 0.95 | 0.01 | 0.66 | 0.07 | 0.82 | 0.04 |
|            | Phenotype |        | 0.95 | 0.01 | 0.58 | 0.09 | 0.77 | 0.06 |

**Table S7:** Genomic predictive abilities of the performance within each condition (continuous flooding – CF and alternate wetting and drying – AWD) using single or multi-environment models for across population validation. The scenarios used to define the training set are S1 (only the parents), S2 (100 individuals of the RP selected with CDmean) and S3 (the whole RP). Results for days to flowering (FL), nitrogen balance index (NI) and panicle weight (PW) are presented. Two statistical models (GBLUP, RKHS) were used in single environment prediction and three (GBLUP, RKHS-1 and RKHS-2) in multi-environment prediction.

| Condition | Scenario | Model  | Type   | FL    | NI     | PW    |
|-----------|----------|--------|--------|-------|--------|-------|
| AWD       | S1       | GBLUP  | Single | 0.32  | 0.252  | 0.513 |
|           |          | GBLUP  | Multi  | 0.307 | 0.362  | 0.435 |
|           |          | RKHS   | Single | 0.365 | 0.027  | 0.537 |
|           |          | RKHS-1 | Multi  | 0.379 | 0.036  | 0.521 |
|           |          | RKHS-2 | Multi  | 0.375 | 0.087  | 0.546 |
|           | S2       | GBLUP  | Single | 0.227 | 0.268  | 0.391 |
|           |          | GBLUP  | Multi  | 0.284 | 0.338  | 0.255 |
|           |          | RKHS   | Single | 0.248 | 0.239  | 0.398 |
|           |          | RKHS-1 | Multi  | 0.259 | 0.301  | 0.333 |
|           |          | RKHS-2 | Multi  | 0.281 | 0.293  | 0.36  |
|           | S3       | GBLUP  | Single | 0.339 | 0.364  | 0.423 |
|           |          | GBLUP  | Multi  | 0.358 | 0.418  | 0.338 |
|           |          | RKHS   | Single | 0.371 | 0.379  | 0.494 |
|           |          | RKHS-1 | Multi  | 0.389 | 0.439  | 0.463 |
|           |          | RKHS-2 | Multi  | 0.387 | 0.462  | 0.478 |
| CF        | S1       | GBLUP  | Single | 0.269 | 0.189  | 0.48  |
|           |          | GBLUP  | Multi  | 0.199 | 0.196  | 0.504 |
|           |          | RKHS   | Single | 0.369 | -0.034 | 0.562 |
|           |          | RKHS-1 | Multi  | 0.356 | -0.031 | 0.57  |
|           |          | RKHS-2 | Multi  | 0.356 | -0.029 | 0.578 |
|           | S2       | GBLUP  | Single | 0.144 | 0.271  | 0.282 |
|           |          | GBLUP  | Multi  | 0.202 | 0.316  | 0.306 |
|           |          | RKHS   | Single | 0.158 | 0.285  | 0.314 |
|           |          | RKHS-1 | Multi  | 0.168 | 0.33   | 0.322 |
|           |          | RKHS-2 | Multi  | 0.184 | 0.312  | 0.347 |
|           | S3       | GBLUP  | Single | 0.284 | 0.391  | 0.417 |
|           |          | GBLUP  | Multi  | 0.295 | 0.324  | 0.443 |
|           |          | RKHS   | Single | 0.362 | 0.405  | 0.517 |
|           |          | RKHS-1 | Multi  | 0.354 | 0.362  | 0.516 |
|           |          | RKHS-2 | Multi  | 0.36  | 0.389  | 0.526 |
